# Supplementary material for: Intracellular Reactive Oxygen Species Mediate the Therapeutic Effect of Induced Pluripotent Stem Cells for Acute Kidney Injury
Source: Hindawi journal article supplement (doi:10.1155/2020/1609638), 2020-03-26
Supplement: f1 [file 1609638.f1.zip]

## **Supplemental figure legends**

**Supplemental figure 1. Kidney blood flow.** Representative images of kidney blood flow before, during and after (10 min) kidney ischemia/reperfusion injury.

**Supplemental figure 2. Graphical abstract.** Intracellular ROS are necessary for iPSCs to engraft and treat IRI injured kidney. Moderate increases in intracellular ROS promote iPSC engraftment and the ensuing therapeutic function.

## Supplemental Figure 1

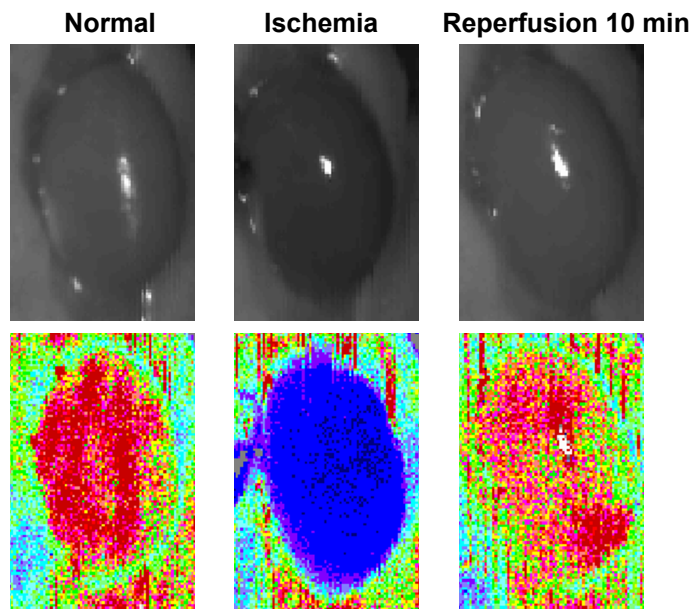

**Kidney blood flow.** Representative images of kidney blood flow before, during and after (10 min) kidney ischemia/reperfusion injury.

## Supplemental Figure 2

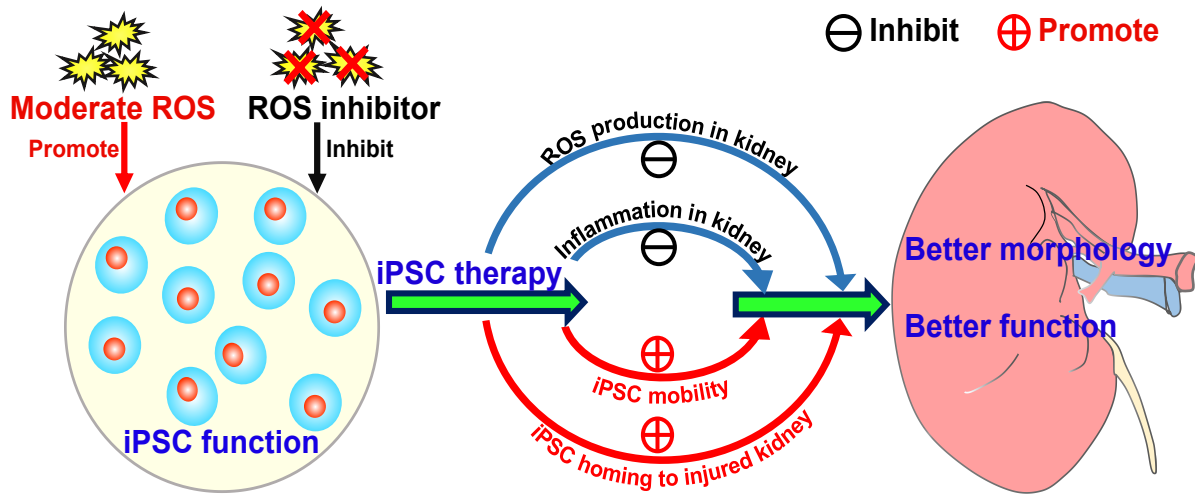

**Graphical abstract.** Intracellular ROS are necessary for iPSCs to engraft and treat IRI injured kidney. Moderate increases in intracellular ROS promote iPSC engraftment and the ensuing therapeutic function.

**Supplemental Table 1 . Detailed information on primer sequences and key resources**

| Primers                                    |                                                    | Primer pair sequences  | Amplicon size |
|--------------------------------------------|----------------------------------------------------|------------------------|---------------|
| IL-1 β (mouse)                             | forward                                            | TGCCACCTTTTGACAGTGATG  | 220 bp        |
|                                            | reverse                                            | AAGGTCCACGGGAAAGACAC   |               |
| CXCL-1 (mouse)                             | forward                                            | ACCGAAGTCATAGCCACACTC  | 113 bp        |
|                                            | reverse                                            | CTCCGTTACTTGGGGACACC   |               |
| IL-6 (mouse)                               | forward                                            | GCCTTCTTGGGACTGATGCT   | 181 bp        |
|                                            | reverse                                            | TGCCATTGCACAACTCTTTTCT |               |
| MCP-1 (mouse)                              | forward                                            | AGCTGGAGCTGAGGAGATTA   | 100 bp        |
|                                            | reverse                                            | GTCCTCAGAACCTCTGTCCG   |               |
| TNF-α (mouse)                              | forward                                            | CCCTCACACTCACAAACCAC   | 133 bp        |
|                                            | reverse                                            | ACAAGGTACAACCCATCGGC   |               |
| IL-10 (mouse)                              | forward                                            | GGTTGCCAAGCCTTATCGGA   | 159 bp        |
|                                            | reverse                                            | GGGGAGAAATCGATGACAGC   |               |
| GAPDH (mouse)                              | forward                                            | GTATTGGGCGCCTGGTC      | 201bp         |
|                                            | reverse                                            | GCTCCTGGAAGATGGTGATG   |               |
| Tet-on                                     | forward                                            | AGCACAACTACGCCGCACCC   | 402bp         |
|                                            | reverse                                            | ATGCACCAGAGTTTCGAAGC   |               |
| 18s (mouse)                                | forward                                            | GAGAAACGGCTACCACATCC   | 170 bp        |
|                                            | reverse                                            | CACCAGACTTGCCCTCCA     |               |
|                                            |                                                    |                        |               |
| Chemicals                                  | Source                                             |                        | Identifier    |
| Creatinine assay kit                       | Jiancheng Bioengineering Institute, Nanjing, China |                        | Cat#C011-1-1  |
| BUN assay kit                              | Jiancheng Bioengineering Institute, Nanjing, China |                        | Cat#C013-2-1  |
| Non-traumatic microvessel clamp            | S&T AG, Neuhausen, Switzerland                     |                        | Size B-1 V    |
| Optimum cutting temperature compound (OCT) | Sakura Finetek Inc., Tokyo, Japan                  |                        | Cat#4583      |
| Dihydroethidium                            | Beyotime Biotechnology Inc., Shanghai, China       |                        | Cat#S0063     |

|                                                 |                                                         |                       |
|-------------------------------------------------|---------------------------------------------------------|-----------------------|
| Cell counting kit-8                             | Dojindo Molecular Technologies Inc.,<br>Shanghai, China | Cat#LC617             |
| Mounting medium,<br>anti-fading                 | Solarbio Science & Technology Ltd, Beijing,<br>China    | Cat#S2100             |
| Hydrogen peroxide<br>solution                   | Sigma-Aldrich Co., Saint Louis, MO, USA                 | Cat#323381            |
| Trypsin-ethylene<br>diamine tetraacetic<br>acid | Sigma-Aldrich Co., Saint Louis, MO, USA                 | Cat#T4049             |
| N-acetylcysteine                                | Sigma-Aldrich Co., Saint Louis, MO, USA                 | Cat#BP907             |
| PKH26 red<br>fluorescent cell<br>linker kit     | Sigma-Aldrich Co., Saint Louis, MO, USA                 | Cat#MIDI26            |
| Fetal bovine serum                              | Thermo Fisher Scientific Inc., MA, USA                  | Cat#10100147          |
| Matrigel                                        | BD Biosciences Inc., San Jose, USA                      | Cat#354277            |
| Transwell                                       | Corning Inc., NY, USA                                   | Cat#3464,<br>Cat#3401 |
| Sucrose                                         | Sinopharm Chemical Reagent Ltd, Shanghai,<br>China      | Cat#10021418          |
| SYBR Green PCR<br>Master Mix                    | Thermo Fisher Scientific Inc., MA, USA                  | Cat#4309155           |
| Paraformaldehyde                                | Sigma-Aldrich Co., Saint Louis, MO, USA                 | Cat#158127            |
| Gelatin                                         | Sigma-Aldrich Co., Saint Louis, MO, USA                 | Cat#V900863           |
| Dulbecco's modified<br>Eagle's medium           | Thermo Fisher Scientific Inc., MA, USA                  | Cat#10565018          |
| L-Glutamine                                     | Thermo Fisher Scientific Inc., MA, USA                  | Cat#25030081          |
| Sodium pyruvate                                 | Thermo Fisher Scientific Inc., MA, USA                  | Cat#11360070          |
| Non-essential amino<br>acids                    | Thermo Fisher Scientific Inc., MA, USA                  | Cat#11140050          |
| $\beta$ -Mercaptoethanol                        | Sigma-Aldrich Co., Saint Louis, MO, USA                 | Cat#97622-10ML        |
| Leukemia inhibitory<br>factor                   | Merck Millipore Ltd., Darmstadt, Germany.               | Cat#LIF2005           |
| Penicillin-<br>streptomycin                     | Thermo Fisher Scientific Inc., MA, USA                  | Cat#15140163          |

|                                                        |                                                     |                      |
|--------------------------------------------------------|-----------------------------------------------------|----------------------|
| Pentobarbital sodium                                   | Sigma-Aldrich Co., Saint Louis, MO, USA             | Cat#P3761            |
| DreamTaq Green PCR Master Mix                          | Thermo Fisher Scientific Inc., MA, USA              | Cat#K1082            |
| TRIzol Reagent                                         | Thermo Fisher Scientific Inc., MA, USA              | Cat#15596026         |
| DNAzol™ Reagent                                        | Thermo Fisher Scientific Inc., MA, USA              | Cat#10503027         |
| Monoclonal anti-aquaporin 1                            | Abcam Inc., Cambridge, UK                           | ab-9566              |
| Monoclonal calbindin D28K                              | SantaCruz Biotechnology Inc., CA, USA               | sc-365360            |
| Agilent Seahorse XF cell Mitochondrial stress test kit | Agilent Technologies Inc., Santa Clara, CA,US       | 103015-100           |
|                                                        |                                                     |                      |
| <b>Animals</b>                                         | <b>Organisms/Strains</b>                            |                      |
| Mouse: C57BL/6                                         | Shanghai Laboratory Animal Ltd, Shanghai, China     |                      |
|                                                        |                                                     |                      |
| <b>Instruments</b>                                     | <b>Source</b>                                       | <b>Model</b>         |
| Freezing microtome                                     | Leica Biosystems, Wetzlar, Germany                  | CM1950               |
| Microplate reader                                      | BioTek Instruments Inc., Winooski, VT, USA          | Synergy H1           |
| CFX96™ Real-Time system                                | Bio-Rad Laboratories Inc., Berkeley, CA, USA        | CFX96™ Optics Module |
| Tanon 3500 gel imaging system                          | Tanon Science & Technology Ltd, Shanghai, China     | Tanon 3500           |
| TissueLyzer                                            | JingXin Industrial Development Ltd, Shanghai, China | JXFSTPRP-24          |
| Fluorescence microscope                                | Leica Microsystems, Wetzlar, Germany                | DMi8                 |
| MoorLDI2-2 laser doppler imaging system                | Moor Instruments Ltd., Devon, UK                    | MoorLDI2-HIR         |
| Transdermal GFR                                        | NIC-Kidney, Mannheim Pharma & Diagnostics           | SN:UD1211            |

|                                    |                                   |                 |
|------------------------------------|-----------------------------------|-----------------|
| monitor                            | GmbgH, Mannheim, Germany          |                 |
| F96 extracellular<br>flux analyzer | Agilent Technologies Inc, CA, USA | Seahorse XFe/XF |
