# Supplementary material for: Intracellular Reactive Oxygen Species Mediate the Therapeutic Effect of Induced Pluripotent Stem Cells for Acute Kidney Injury
Source: Oxid Med Cell Longev. 2020 Mar 26;2020:1609638. doi: 10.1155/2020/1609638 (PMC7136790; doi:10.1155/2020/1609638)
Supplement: Supplementary Materials — Supplemental Figure 1: kidney blood flow. Representative images of kidney blood flow before, during, and after (10 min) kidney ischemia/reperfusion injury. Supplemental Figure 2: graphical abstract. Intracellular ROS are necessary for iPSCs to engraft and treat IRI-injured kidney. Moderate increases in intracellular ROS promote iPSC engraftment and the ensuing therapeutic function. Supplemental Table 1: detailed information on primer sequences and key resources. [file 1609638.f1.zip]

Archive with 3 entries (3 files):
- 11.Supple Fig 1_OMCL_3023895.ai
- 12.Supp Fig 2-GA_OMCL_3023896.ai
- mat.1609638.v2.pdf
